# Supplementary material
Source: PubMed Central journal article supplement (PMC3015156)
Supplement: emm-42-823-s001.pdf [file emm-42-823-s001.pdf]

## Supplemental Data

**Figure S1.** LPS iv injection changed TNF- $\alpha$  levels in the plasma. Bloods were collected at the indicated times after LPS (100 or 500  $\mu\text{g}$ ) iv injection. The amount of TNF- $\alpha$  was measured using ELISA kits (Biosource International, Inc., Camarillo, CA, USA). Values are mean  $\pm$  SEM of samples obtained from 3 or 4 rats.

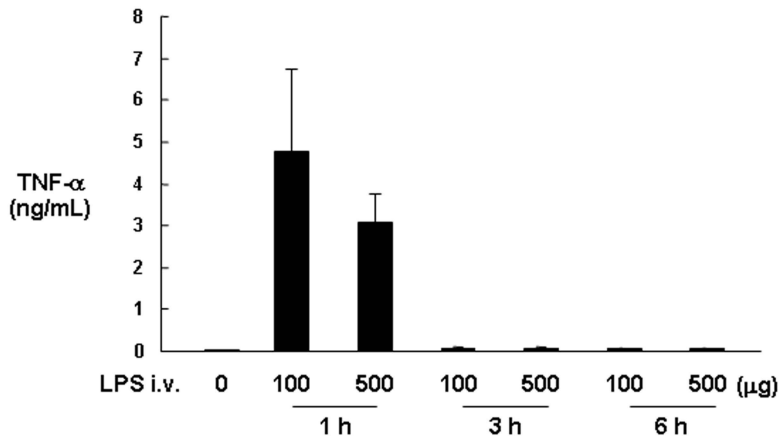

## Supplemental Data

**Table S1.** List of primer sequences for Q-PCR

| Gene  | Sequence (5'-3')                                                   |
|-------|--------------------------------------------------------------------|
| IL-1  | <b>F-</b> TGATGTTCCCATTAGACAGC<br><b>R-</b> GAGGTGCTGATGTACCAGTT   |
| TNF-  | <b>F-</b> GTAGCCCACGTCGTAGCAA<br><b>R-</b> CCCTTCTCCAGCTGGGAGAC    |
| IL-6  | <b>F-</b> AAAATCTGCTCTGGTCTTCTGG<br><b>R-</b> GGTTTGCCGAGTAGACCTCA |
| GAPDH | <b>F-</b> TCCCTCAAGATTGTCAGCAA<br><b>R-</b> AGATCCACAACGGATACATT   |

F, Forward primer; R, Reverse primer
